# Supplementary material
Source: Springer Nature journal article supplement (https://www.springermedizin.de/resource/supplementary/12916_2010_310_MOESM2_ESM.pdf/9599608)

Change from baseline (mins)

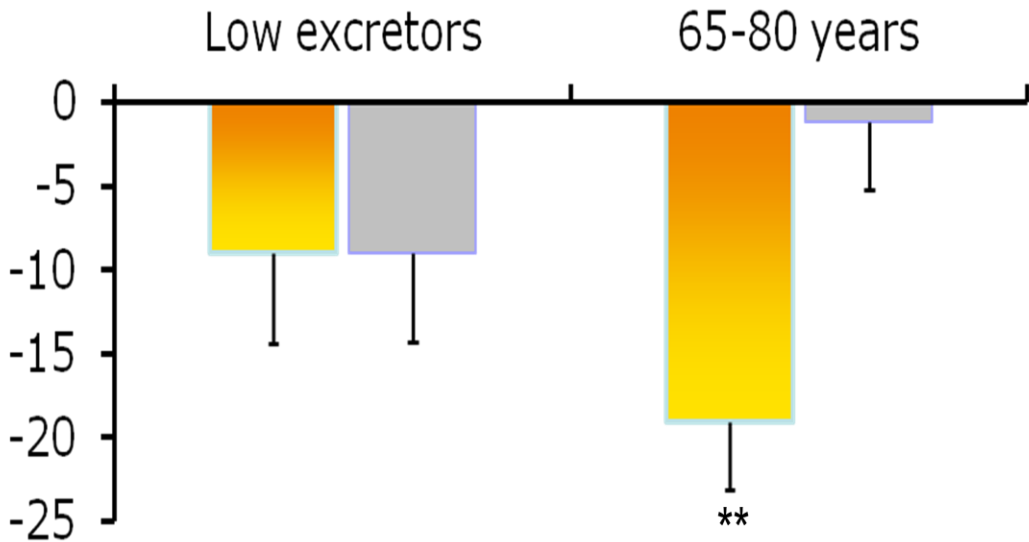

PRM 2mg  
Placebo

Supplement: MOESM2 [file 9599608]
